# Supplementary material for: STING Negatively Regulates Double-Stranded DNA-Activated JAK1-STAT1 Signaling via SHP-1/2 in B Cells
Source: PubMed Central journal article supplement — Mol Cells. 2015 May 7;38(5):441–51. doi: 10.14348/molcells.2015.2359 (PMC4443286; doi:10.14348/molcells.2015.2359), 2015-05-07
Supplement: molce-38-5-441-supplementary.pdf [file molce-38-5-441-supplementary.pdf]

# Supplemental Data

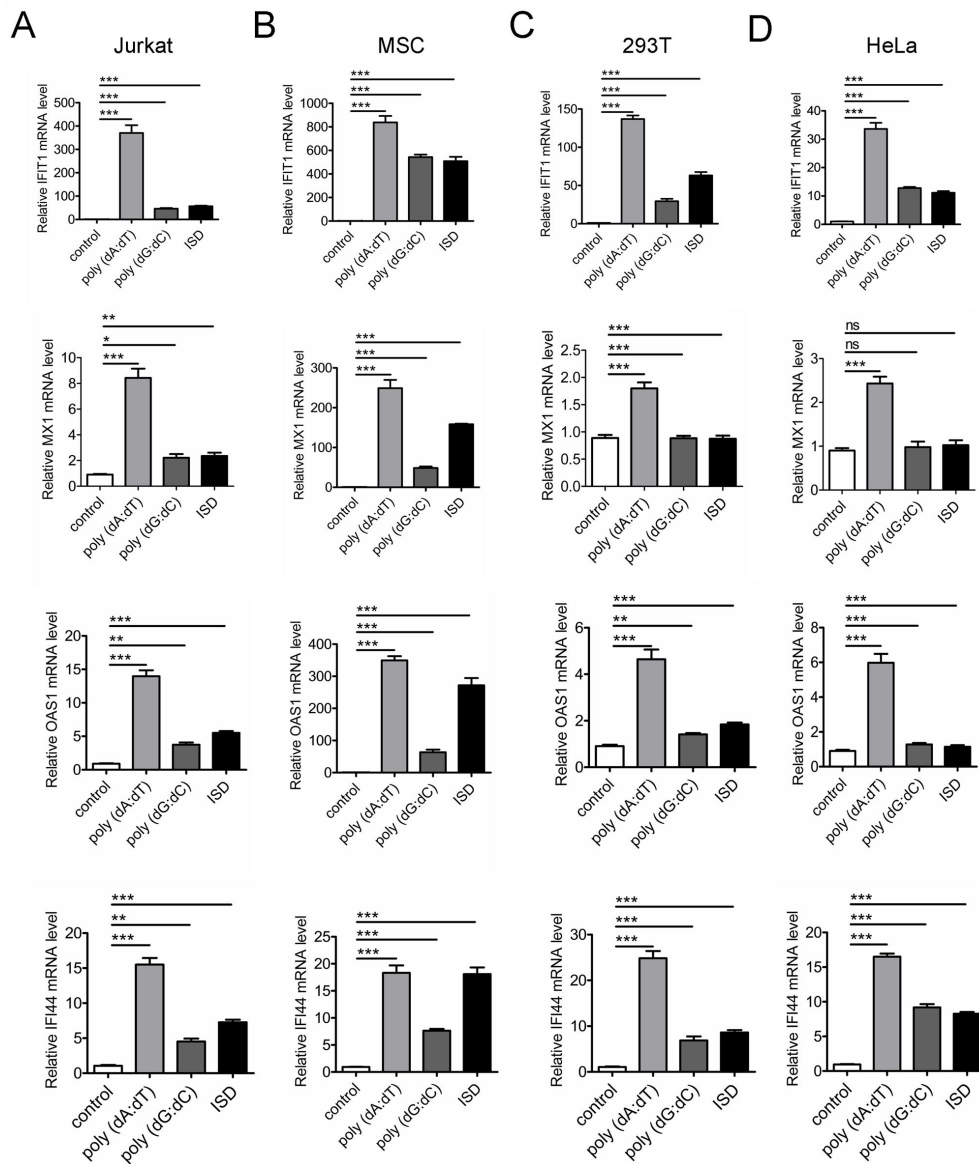

**Fig. S1.** dsDNA promotes the expression of IFIT1, MX1, OAS1 and IFI44 in Jurkat, hMSC, 293T and HeLa cells. Jurkat, hMSC, 293T and HeLa cells were transfected with poly(dA:dT) (2  $\mu\text{g/ml}$ ), poly(dG:dC) (2  $\mu\text{g/ml}$ ) or ISD (2  $\mu\text{g/ml}$ ) for 6 h. qPCR analysis of the expression levels of IFIT1, MX1, OAS1 and IFI44 in Jurkat (A), Human MSC (B), HEK293T (C) and HeLa (D). Data shown are the mean of 3 independent experiments; error bars represent s.e.m. \* $p < 0.05$ , \*\* $p < 0.01$ , \*\*\* $p < 0.001$ ; ns denotes  $p > 0.05$ .

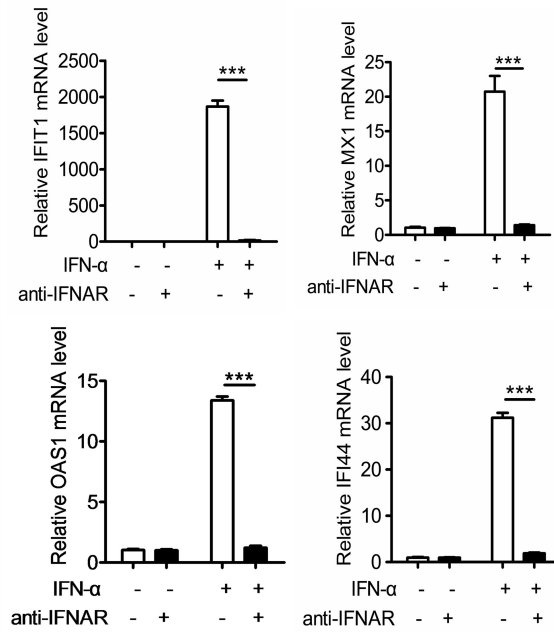

**Fig. S2.** Anti-IFNAR neutralizing antibody inhibits IFN- $\alpha$ -induced expression of IFIT1, MX1, OAS1 and IFI44 in BJAB cells. BJAB cells were treated with the neutralizing antibody for the IFN- $\alpha/\beta$  receptor (Merck & Millipore) for 30 min prior to stimulation with IFN- $\alpha$  for 6 h. The expression levels of IFIT1, MX1, OAS1 and IFI44 were detected by qPCR. Data shown are the mean of 3 independent experiments; error bars represent s.e.m. \* $p$ <0.05, \*\* $p$ <0.01, \*\*\* $p$ <0.001; ns denotes  $p$ >0.05.

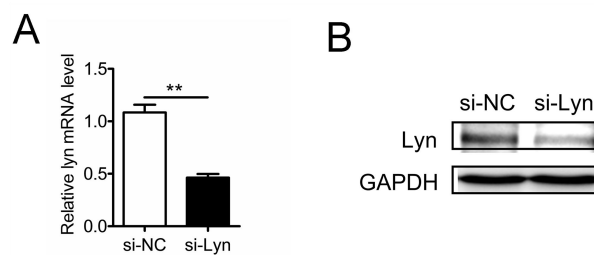

**Fig. S3.** Lyn knockdown in BJAB cells. (A and B) BJAB cells were transfected with si-Lyn or si-NC for 36 h and were then harvested for qPCR and western blot analysis. Data shown are the mean of 3 independent experiments; error bars represent s.e.m. \* $p$ <0.05, \*\* $p$ <0.01, \*\*\* $p$ <0.001; ns denotes  $p$ >0.05.

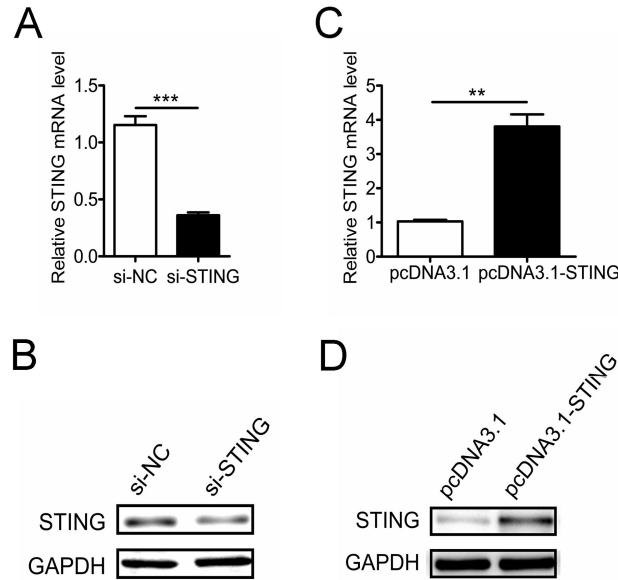

**Fig. S4.** Overexpression and knockdown of STING in BJAB cells. (A and B) BJAB cells were transfected with si-STING or si-NC for 36 h and were then harvested for qPCR and western blot analysis. (C and D) BJAB cells were transfected with pcDNA3.1-STING or control plasmid for 36 h and were then harvested for qPCR and western blot analysis. Data shown are the mean of 3 independent experiments; error bars represent s.e.m. \* $p < 0.05$ , \*\* $p < 0.01$ , \*\*\* $p < 0.001$ ; ns denotes  $p > 0.05$ .

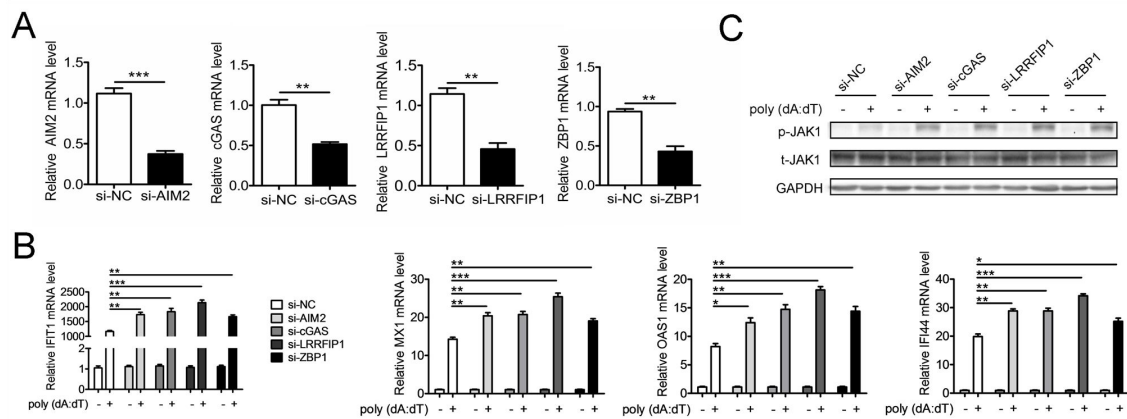

**Fig. S5.** DNA sensors, including AIM2, cGAS, LRRFIP1 and ZBP1, negatively regulate poly(dA:dT)-triggered activation of JAK1-STAT1 signaling. (A) BJAB cells were transfected with si-AIM2, si-cGAS, si-LRRFIP1 or si-ZBP1 for 36 h. qPCR analysis of the expression of AIM2, cGAS, LRRFIP1 and ZBP1. (B) BJAB cells were transfected with si-AIM2, si-cGAS, si-LRRFIP1 or si-ZBP1 for 48 h prior to transfection with poly(dA:dT) (2  $\mu\text{g/ml}$ ). After 6 hours, the expression of IFIT1, MX1, OAS1 and IFI44 were detected using qPCR. (C) BJAB cells were

transfected with si-AIM2, si-cGAS, si-LRRFIP1 or si-ZBP1 for 48 h prior to transfection with poly(dA:dT) (2  $\mu$ g/ml). After 1 hour, the phosphorylation of JAK1 was detected using western blot. Data shown are the mean of 3 independent experiments; error bars represent s.e.m. \* $p$ <0.05, \*\* $p$ <0.01, \*\*\* $p$ <0.001; ns denotes  $p$ >0.05.
